# Supplementary material for: Phlebotomus (Adlerius) simici NITZULESCU, 1931: first record in Austria and phylogenetic relationship with other Adlerius species
Source: Parasit Vectors. 2021 Jan 6;14:20. doi: 10.1186/s13071-020-04482-8 (PMC7788815; doi:10.1186/s13071-020-04482-8)
Supplement: Supplementary file 1 — Additional file 1: Table S1. Included coxI sequences of Adlerius spp. for pairwise distance calculations. [file 13071_2020_4482_MOESM1_ESM.xlsx]

## Sheet: Additional file 1
Additional file 1: Table S1. Included COI sequences of Adlerius spp. for pairwise distance calculations.
GenBank accession	species	country
MN812831.1	P. simici	Austria
MT452050.1	P. simici	North Macedonia
MT452051.1	P. simici	North Macedonia
KU519497.1	P. simici	Greece
KU519498.1	P. simici	Greece
KU519499.1	P. simici	Greece
KU519500.1	P. simici	Greece
KU519501.1	P. simici	Greece
MT452054.1	P. simici	Greece
MT452055.1	P. simici	Greece
MT452055.1	P. simici	Greece
MT452060.1	P. simici	Greece
MN086690.1	P. simici	Turkey
MN086690.1	P. simici	Turkey
MN086691.1	P. simici	Turkey
MN086692.1	P. simici	Turkey
MN086693.1	P. simici	Turkey
MN086694.1	P. simici	Turkey
MN086695.1	P. simici	Turkey
MN086696.1	P. simici	Turkey
MN086697.1	P. simici	Turkey
MN086698.1	P. simici	Turkey
MN086699.1	P. simici	Turkey
MN086705.1	P. simici	Turkey
MN086706.1	P. simici	Turkey
MN086707.1	P. simici	Turkey
MN086708.1	P. simici	Turkey
MN086709.1	P. simici	Turkey
MN086710.1	P. simici	Turkey
MN086711.1	P. simici	Turkey
MN086705.1	P. simici	Turkey
MN086700.1	P. simici	Turkey
MN086701.1	P. simici	Turkey
MN086702.1	P. simici	Turkey
MN086703.1	P. simici	Turkey
MN086704.1	P. simici	Turkey
MN086712.1	P. simici	Turkey
MN086713.1	P. simici	Turkey
MN086714.1	P. simici	Turkey
MN086715.1	P. simici	Turkey
MN086716.1	P. simici	Turkey
MN086717.1	P. simici	Turkey
KX822734.1	P. simici	Israel
KX822735.1	P. simici	Israel
MN086683.1	Adlerius spp.	Turkey
MN086684.1	Adlerius spp.	Turkey
MN086685.1	Adlerius spp.	Turkey
MN086686.1	Adlerius spp.	Turkey
MN086687.1	Adlerius spp.	Turkey
MN086688.1	Adlerius spp.	Turkey
MN086689.1	Adlerius spp.	Turkey
MT452062.1	Adlerius spp.	Armenia
MT452063.1	Adlerius spp.	Armenia
MT452064.1	Adlerius spp.	Armenia
MN086680.1	P. brevis	Turkey
MN086681.1	P. brevis	Turkey
MN086682.1	P. brevis	Turkey
MK425636.1	P. balcanicus	Romania
MN003380.1	P. balcanicus	Serbia
MN086653.1	P. balcanicus	Turkey
MN086654.1	P. balcanicus	Turkey
MN086655.1	P. halepensis	Turkey
MN086656.1	P. halepensis	Turkey
MN086657.1	P. halepensis	Turkey
MN086658.1	P. halepensis	Turkey
MN086659.1	P. halepensis	Turkey
MN086660.1	P. halepensis	Turkey
MN086661.1	P. halepensis	Turkey
MN086677.1	P. kyrinae	Turkey
MN086678.1	P. kyrinae	Turkey
MN086679.1	P. kyrinae	Turkey
MF966722.1	P. chinensis	China
MF966727.1	P. chinensis	China
KF137543.1	P. chinensis	China
KF137546.1	P. chinensis	China
KF137548.1	P. chinensis	China
KF137549.1	P. chinensis	China
KF137550.1	P. chinensis	China
KF137551.1	P. longiductus	China
KF137552.1	P. longiductus	China
KF137553.1	P. longiductus	China
KF483670.1	P. arabicus	Turkey
